# Supplementary material for: Bias-invariant RNA-sequencing metadata annotation
Source: PubMed Central journal article supplement (PMC8559615; doi:10.1093/gigascience/giab064), 2021-09-22
Supplement: giab064_response_to_reviewer_comments_revision_2.pdf [file giab064_response_to_reviewer_comments_revision_2.pdf]

## Author's Response To Reviewer Comments

Close

Dear Editor,

As requested, we added the references to the Giga Database and the git repository.  
We re-checked the author's instructions and hope that everything is in order.

Kind Regards

Hannes Wartmann

Close
